# Supplementary material for: Binuclear (salen)osmium phosphinidine and phosphiniminato complexes
Source: Royal Society of Chemistry journal article supplement (doi:10.1039/c0dt01367f), 2011-01-01
Supplement: c0dt01367f.pdf [file c0dt01367f.pdf]

## Supporting Information

### Binuclear (salen)osmium phosphinidine and phosphiniminato complexes

Gui Chen,<sup>a</sup> Wai-Lun Man,<sup>a</sup> Shek-Man Yiu,<sup>a</sup> Tsz-Wing Wong,<sup>a</sup> Lap Szeto,<sup>b</sup> Wing-Tak Wong<sup>b</sup> and Tai-Chu Lau<sup>\*a</sup>

[a] Institute of Molecular Functional Materials and Department of Biology and Chemistry, City University of Hong Kong, Tat Chee Avenue, Kowloon Tong, Hong Kong, PRC

[b] Department of Chemistry, The University of Hong Kong, Pokfulam Road, Hong Kong, PRC

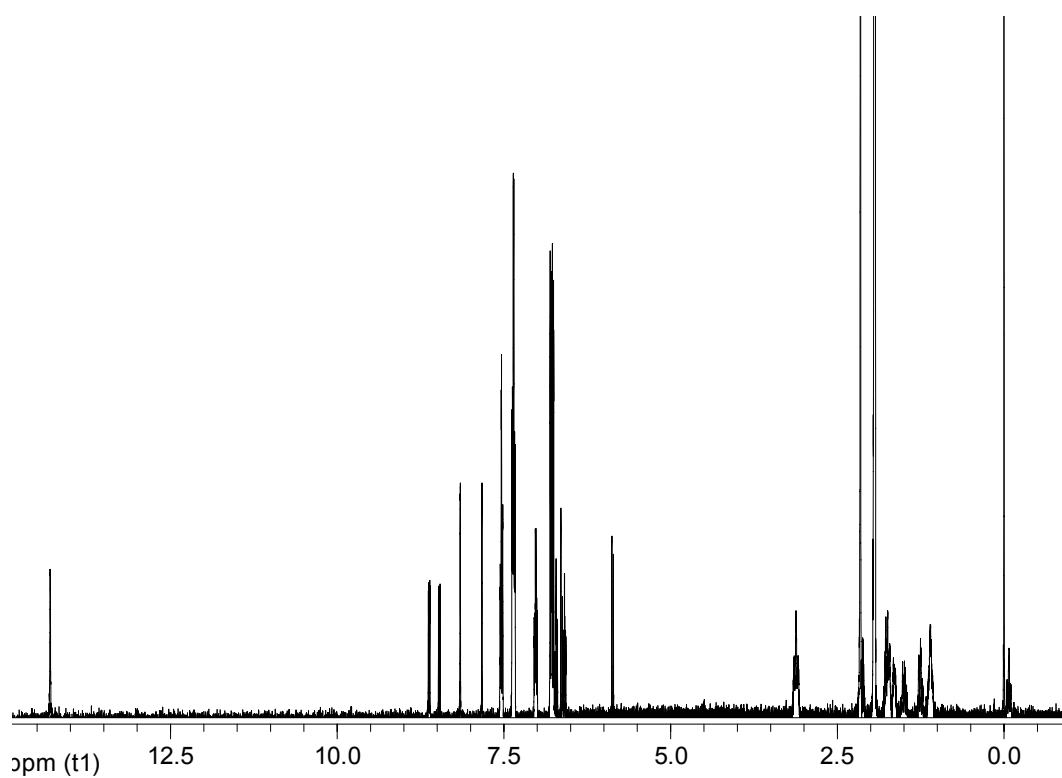

Fig. S1  $^1\text{H}$  NMR (400 MHz,  $\text{CD}_3\text{CN}$ ) of **1a**.

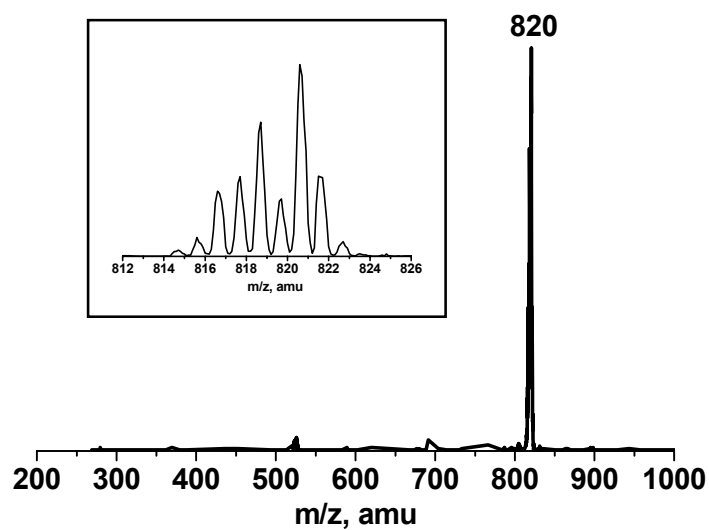

Fig. S2 ESI mass spectrum (+ve mode) of **1a** in CH<sub>3</sub>CN. Inset shows the expanded isotopic pattern.

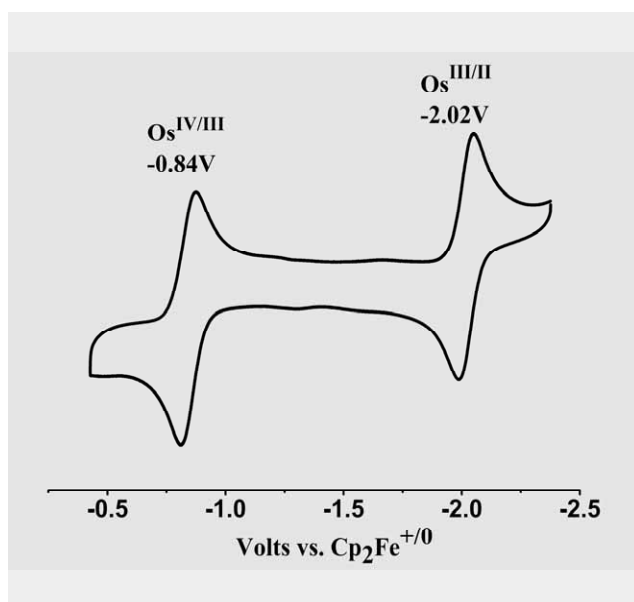

Fig. S3 CV of [Os<sup>IV</sup>(N(H)PPh<sub>3</sub>)(L<sup>1</sup>)(OMe)](PF<sub>6</sub>) (**1a**) in 0.1 M [<sup>n</sup>Bu<sub>4</sub>N]PF<sub>6</sub> in CH<sub>3</sub>CN.

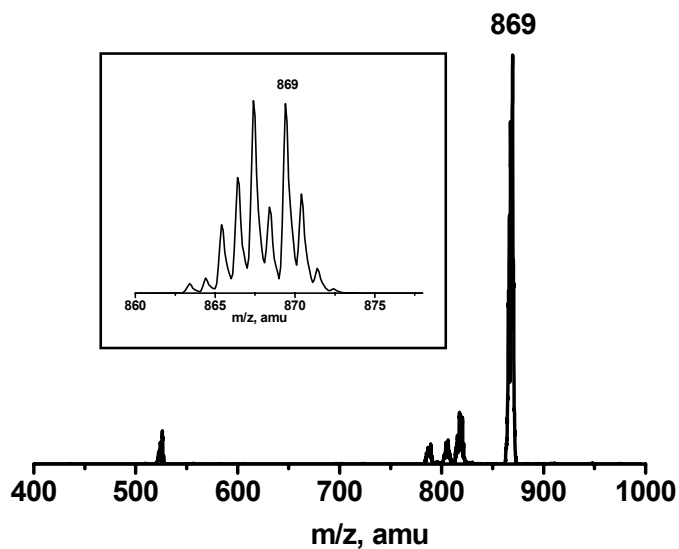

Fig. S4 ESI mass spectrum (+ve mode) of **2** in CH<sub>3</sub>CN. Inset shows the expanded isotopic pattern.

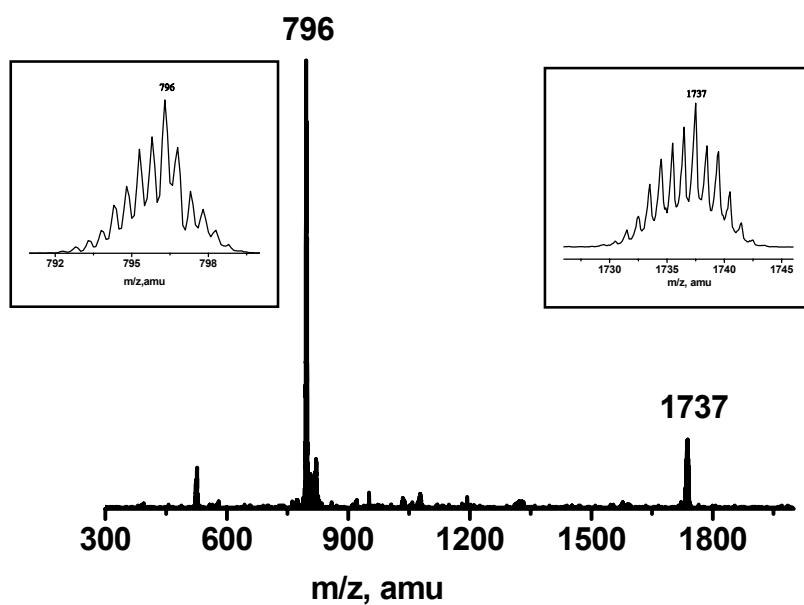

Fig. S5 ESI mass spectrum (+ve mode) of **3** in CH<sub>3</sub>CN. Insets show the expanded isotopic patterns.

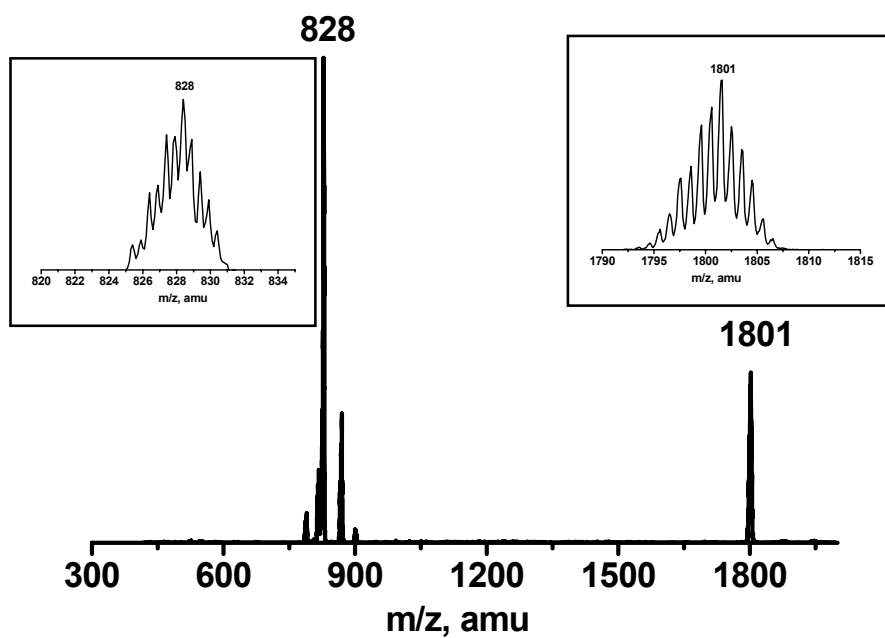

Fig. S6 ESI mass spectrum (+ve mode) of **4** in CH<sub>3</sub>CN. Insets show the expanded isotopic patterns.

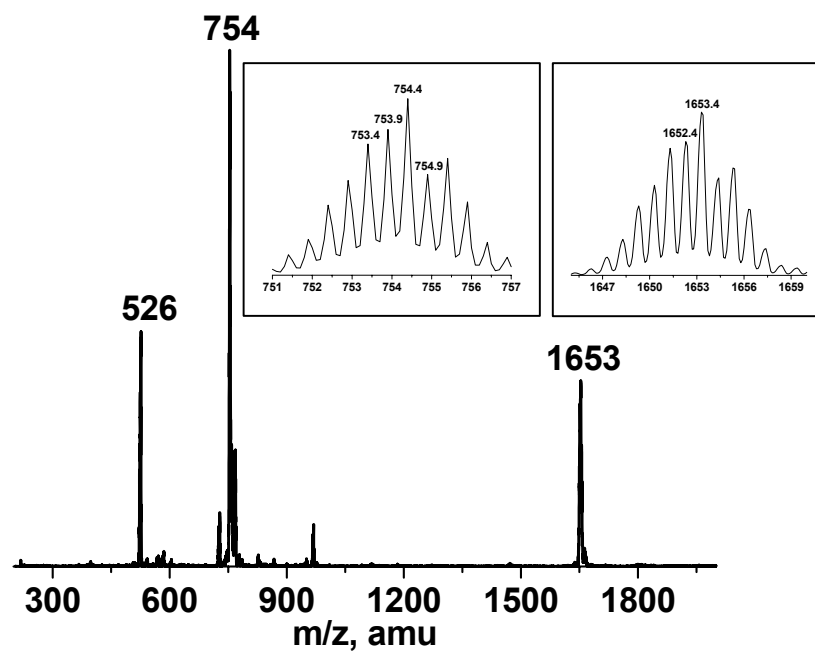

Fig. S7 ESI mass spectrum (+ve mode) of **5** in CH<sub>3</sub>CN. Insets show the expanded patterns.

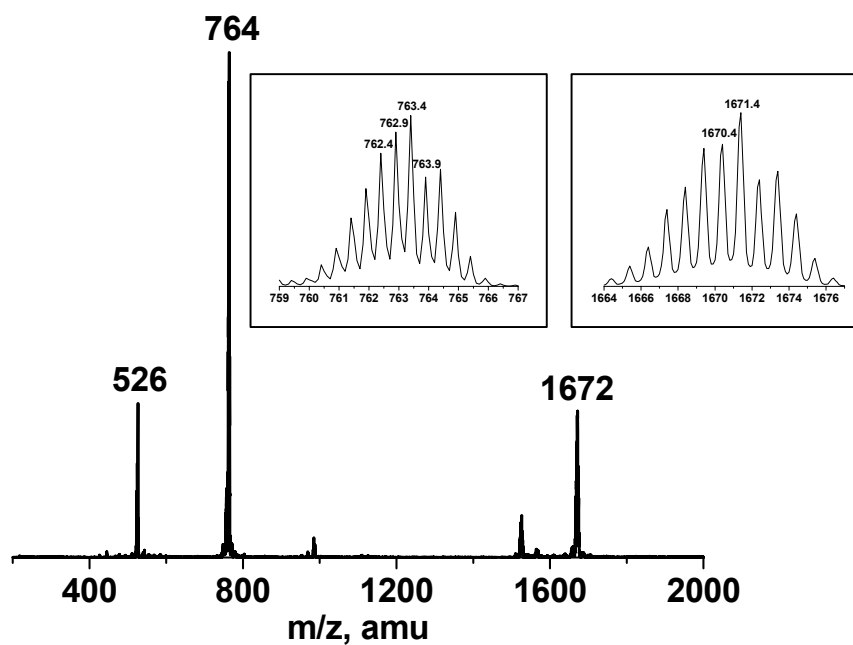

Fig. S8 ESI mass spectrum (+ve mode) of **6** in  $\text{CH}_3\text{CN}$ . Insets show the expanded patterns.

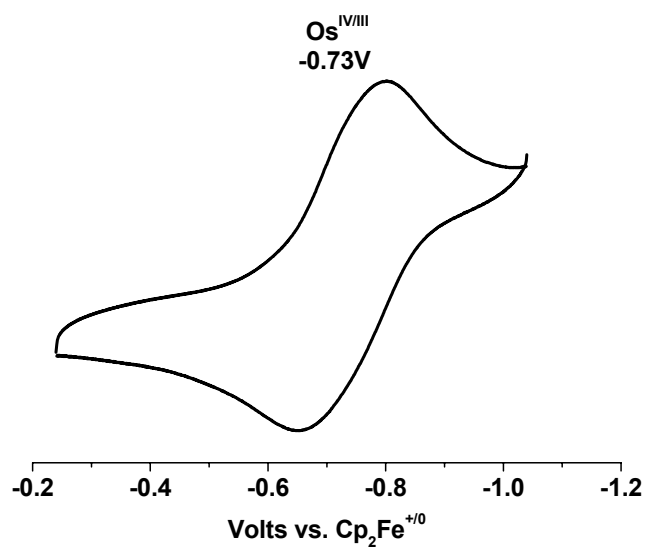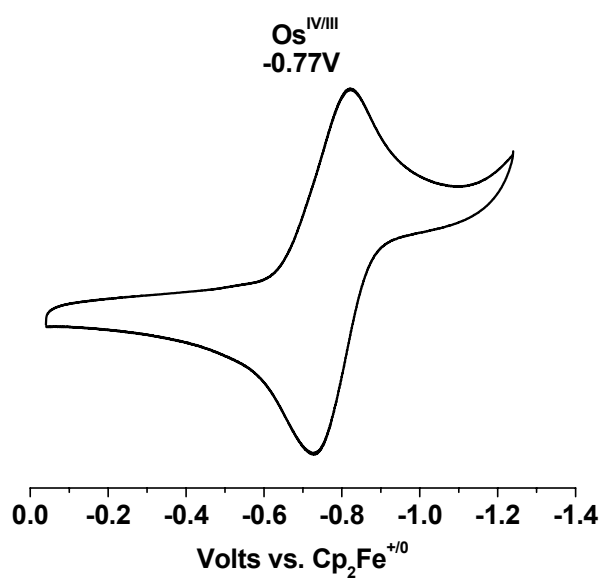

Fig. S9 CV of **5** (top) ( $\Delta E_p = 140$  mV) and **6** ( $\Delta E_p = 80$  mV) (bottom) in CH<sub>3</sub>CN.
